# Supplementary material for: Large genomic differences between Moraxella bovoculi isolates acquired from the eyes of cattle with infectious bovine keratoconjunctivitis versus the deep nasopharynx of asymptomatic cattle
Source: PubMed Central journal article supplement (PMC4752781; doi:10.1186/s13567-016-0316-2), 2016-02-13

A)

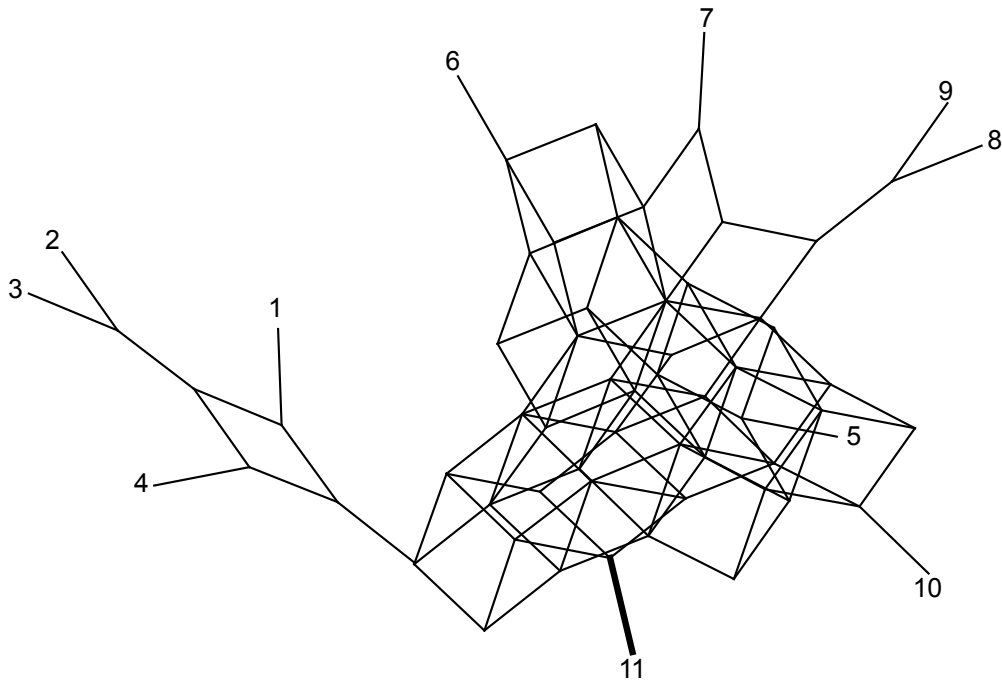

Outgroup Taxa

1) *M. boevrei*

2) *M. caprae*

3) *M. bovis*

4) *M. ovis*

Ingoup Taxa

5) *M. bovoculi*, Mb57922

6) *M. bovoculi*, strain 371

7) *M. bovoculi*, Mb58069

8) *M. bovoculi*, strain 237  
(ATCC BAA-1259)

9) *M. bovoculi*, Mb58086

10) *M. bovoculi*, strain 2471-2

11) *M. bovoculi*, IBK  
asymptomatic nasopharyngeal  
isolates: Mb22581, Mb23343,  
Mb28389, Mb33362

B)

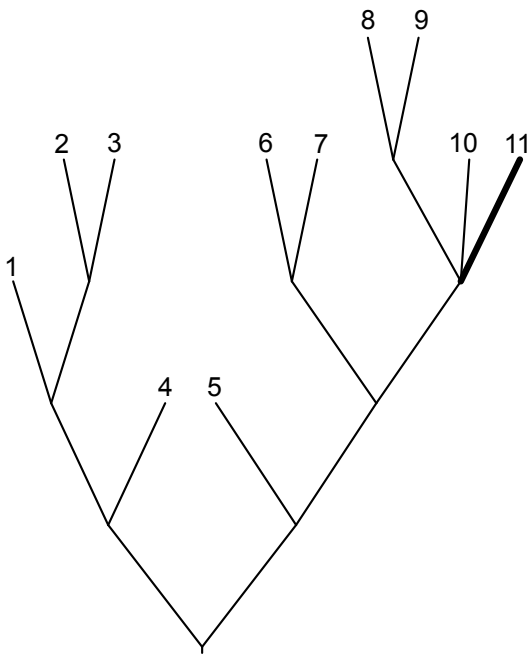

C)

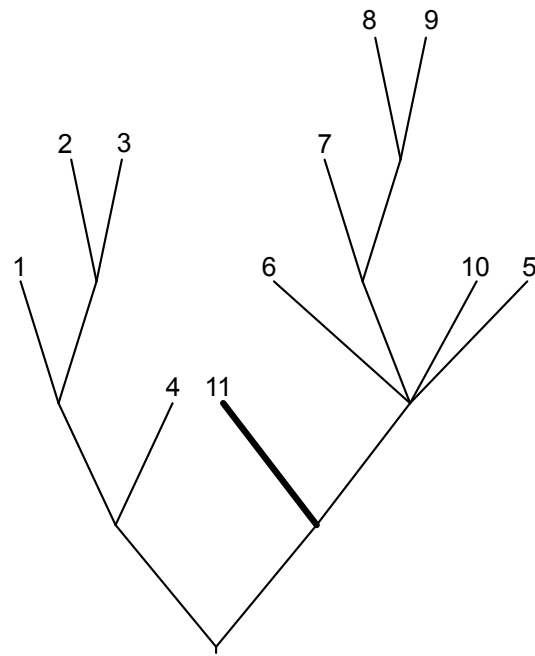

Supplement: 13567_2016_316_MOESM4_ESM.pdf [file 13567_2016_316_MOESM4_ESM.pdf]
